# Supplementary material
Source: publisher figshare collection journal article supplement (https://sage.figshare.com/ndownloader/files/13569323)
Supplement: Supplementary file 1 [file 13569323]

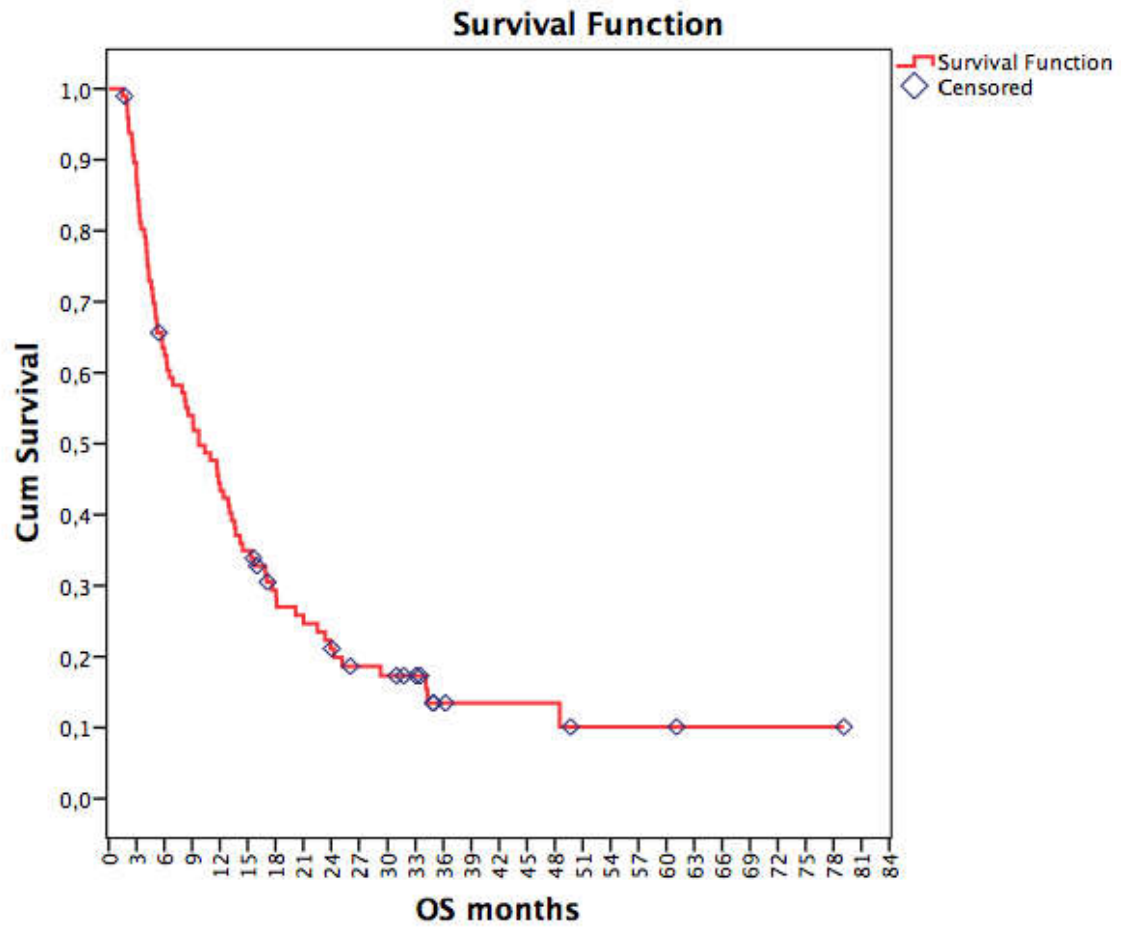

Supp Fig 1: Kaplan-Meier curves for OS. OS curve for a all patient

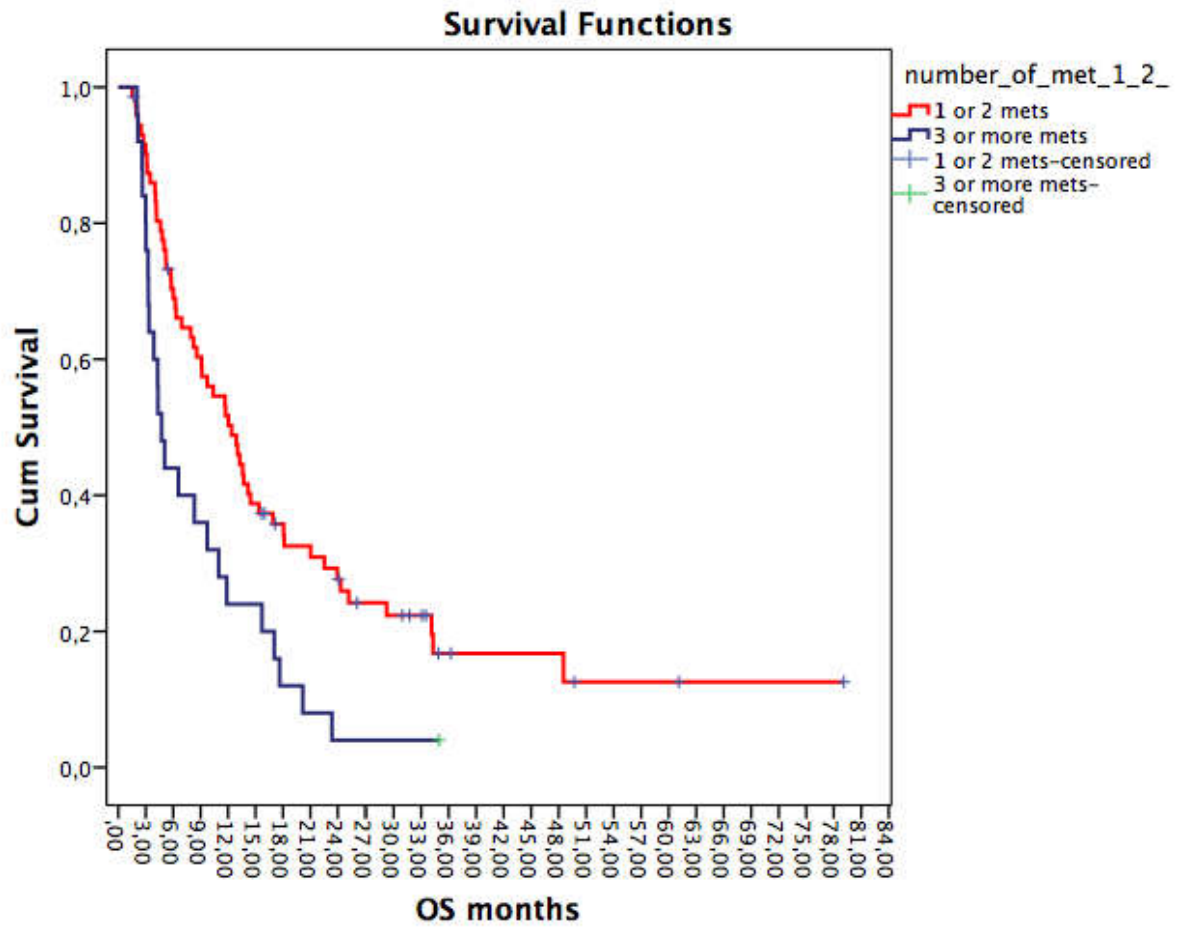

Supp Fig 2: Kaplan-Meier curves for OS related number of metastatic sites

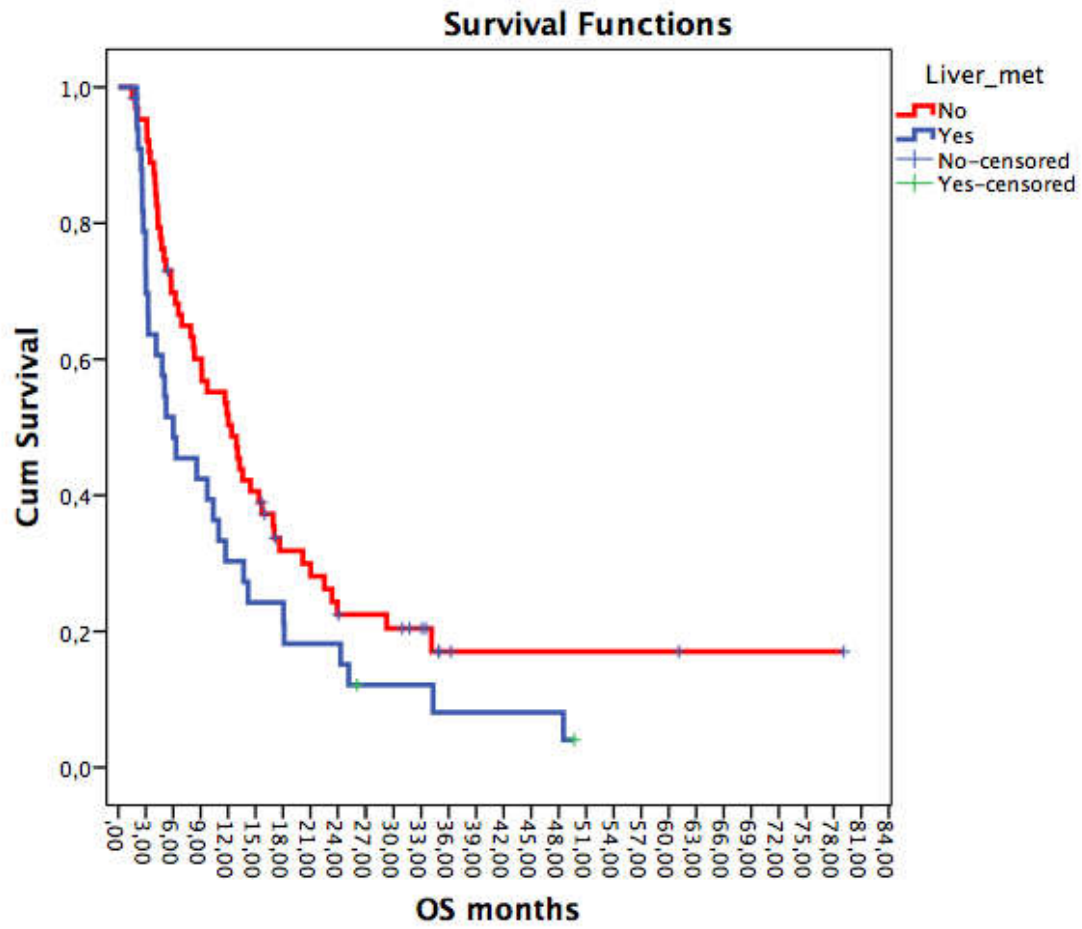

Supp Fig 3: Kaplan-Meier curves for OS related liver metastasis
